# Supplementary material for: The time course of affective processing in anhedonia: insights from event-related potentials
Source: Research Square preprint supplement (doi:10.21203/rs.3.rs-7073207/v1), 2025-09-03
Supplement: Supplementary file 1 [file 598a06113aa4d2b32109c51d.docx]

**Supplementary information**

**The time course of affective processing in anhedonia: insights from event-related potentials**

*Mologni et al.*


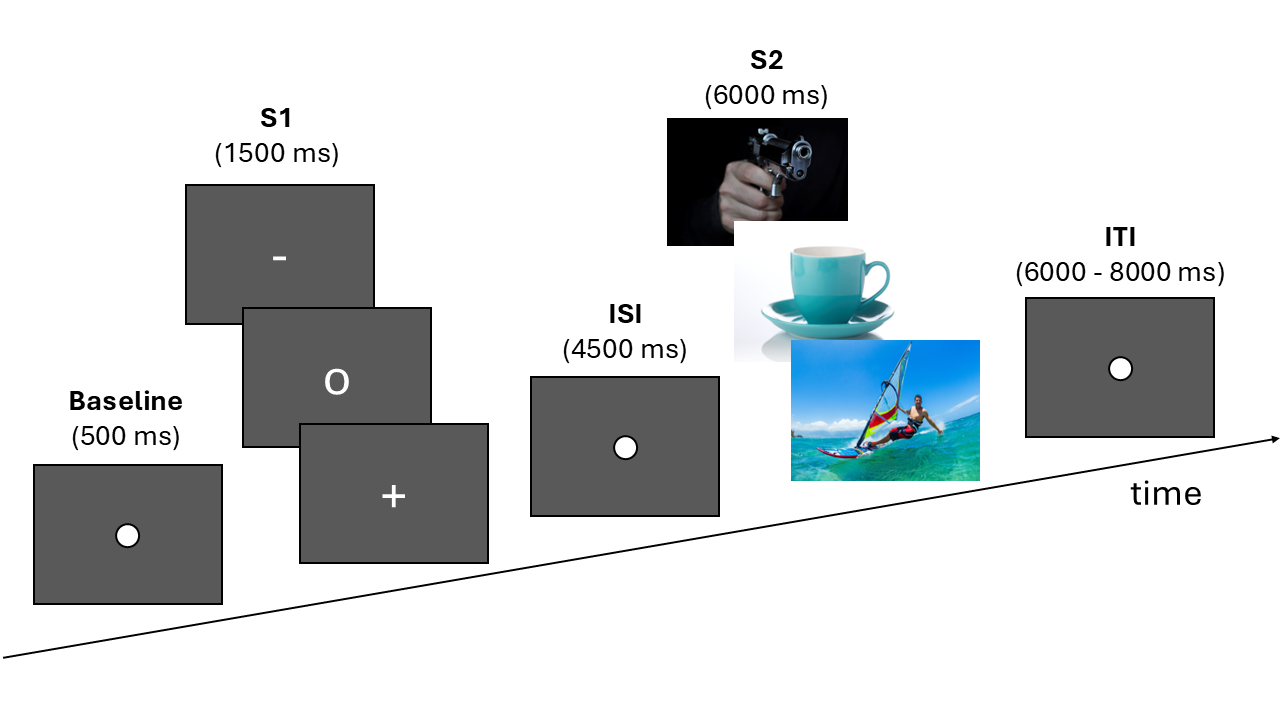


**Figure S1**. Schematic illustration of a trial of the emotional S1-S2 task. The S2 images are for illustrative purposes only and were sourced from an open-access online repository (<https://www.istockphoto.com>).

**
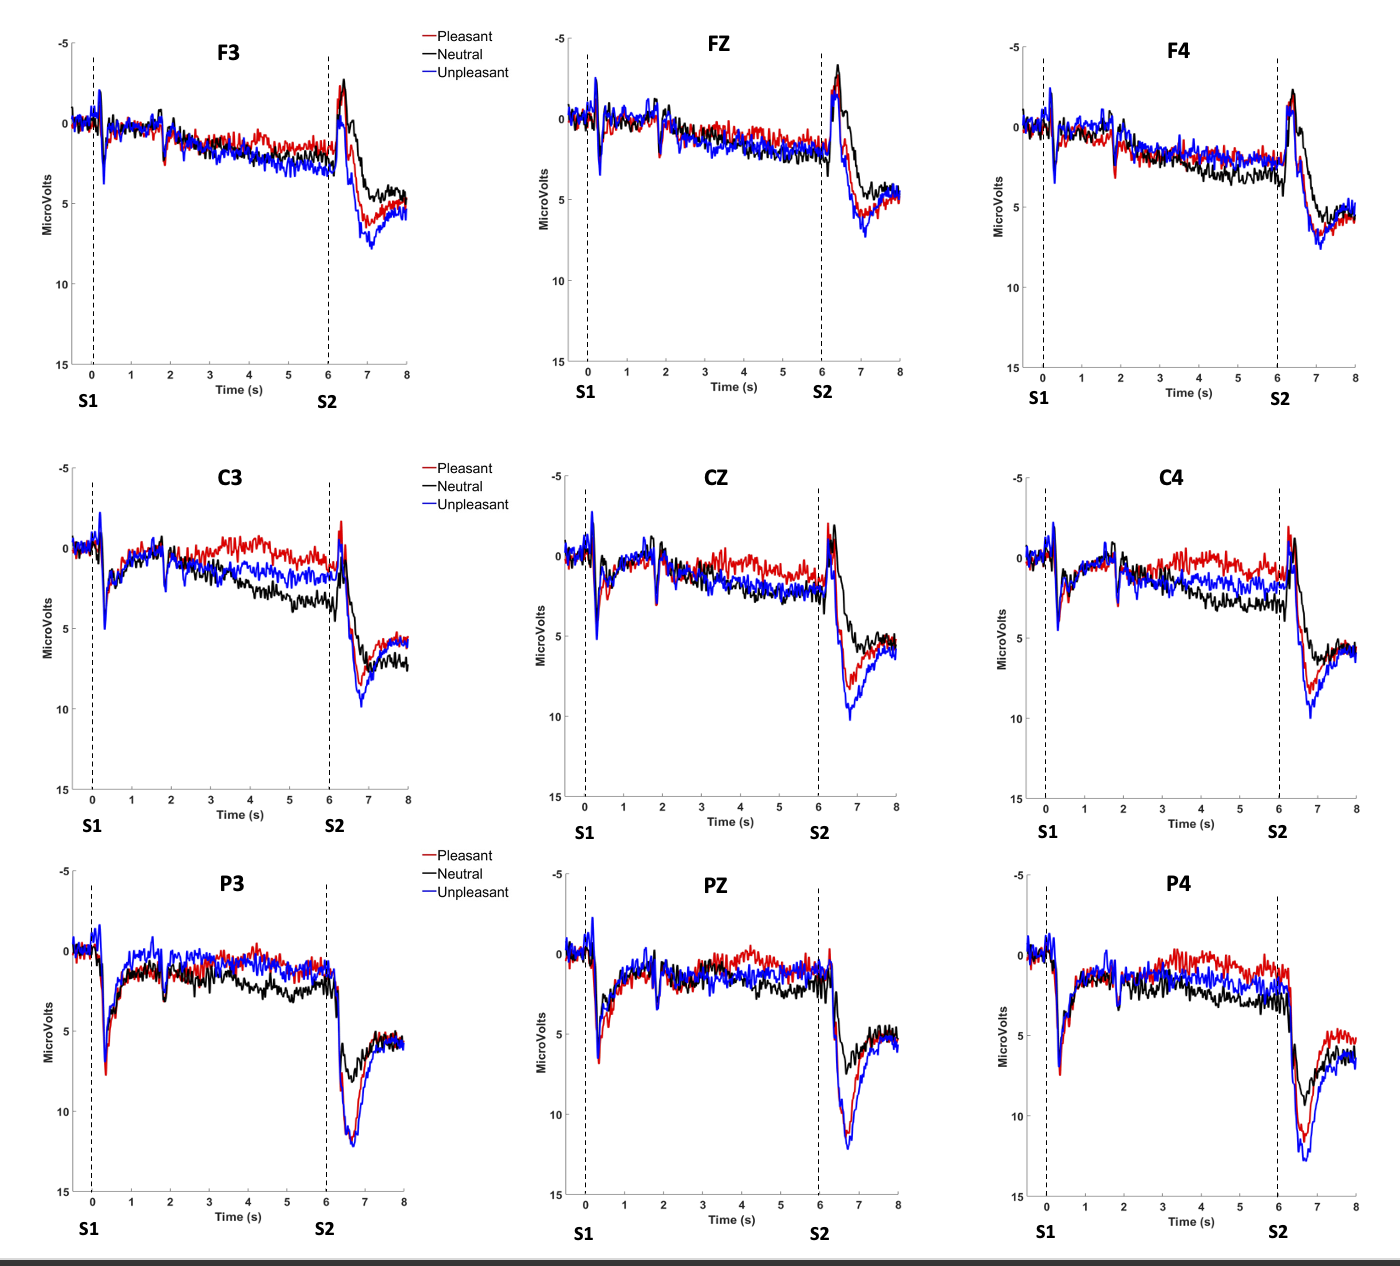
**

**Figure S2**.Grand average ERP waveforms during the S1-S2 task at parietal (P3, PZ, P4), central (C3, CZ, C4), and frontal (F3, FZ, F4) electrodes.

**Table S1.** Linear mixed-models predicting △ERPs amplitudes from emotional category (pleasant, unpleasant) and BDI-II non-anhedonic scores.

| Predictor | b (SE) | *t* | *p* |
| --- | --- | --- | --- |
| **Cue-P300 model** | | | |
| **Category** | **0.72 (0.25)** | **2.87** | **<.01***** |
| BDI-II non-anhedonic | 0.50 (0.40) | 1.24 | .22 |
| Sex | 1.09 (0.83) | 0.86 | .19 |
| Category × BDI-II non-anhedonic | -0.19 (0.25) | -0.75 | .45 |
| **SPN model** | | | |
| Category | -0.83 (0.58) | -1.42 | .15 |
| BDI-II non-anhedonic | 0.65 (0.91) | 0.70 | .48 |
| Sex | 0.12 (1.88) | 0.06 | .94 |
| Category × BDI-II non-anhedonic | -0.28 (0.58) | -0.48 | .63 |
| **LPP model** | | | |
| Category | -1.02 (0.65) | -1.56 | .12 |
| BDI-II non-anhedonic | 0.80 (0.81) | 0.99 | .49 |
| Sex | -1.24 (1.60) | -0.77 | .44 |
| Category × BDI-II non-anhedonic | -0.54 (0.65) | -0.83 | .41 |

*Notes*. The reference levels are Category-unpleasant and Sex-females.Significant results are shown in bold, with asterisks indicating the level of statistical significance (**p* < .05, ***p* < .01, ****p* < .001).
